# Supplementary material for: Immunisation of koalas against Chlamydia pecorum results in significant protection against chlamydial disease and mortality
Source: PubMed Central journal article supplement — NPJ Vaccines. 2024 Aug 6;9:139. doi: 10.1038/s41541-024-00938-5 (PMC11303382; doi:10.1038/s41541-024-00938-5), 2024-08-06
Supplement: 41541_2024_938_MOESM1_ESM.pdf [file 41541_2024_938_MOESM1_ESM.pdf]

Supplementary table 1. *Chlamydia* vaccine trials in koalas

| <u>Antigen</u>   | <u>Adjuvant</u> | <u>Dose</u> | <u>Koalas</u>                         | <u>Captive/Wild</u> | <u>Results</u>                                                                                                                                                  | <u>Reference</u>                                                                                                                                                                                                                                                                                                                                                              |
|------------------|-----------------|-------------|---------------------------------------|---------------------|-----------------------------------------------------------------------------------------------------------------------------------------------------------------|-------------------------------------------------------------------------------------------------------------------------------------------------------------------------------------------------------------------------------------------------------------------------------------------------------------------------------------------------------------------------------|
| MOMP A, F & G    | ISC             | 3           | 60 healthy male female                | Wild                | Decreased <i>C. pecorum</i> load and disease prevalence in vaccinated free-range koalas                                                                         | Waugh C, Khan SA, Carver S, Hanger J, Loader J, Polkinghorne A, et al. A prototype recombinant-protein based <i>Chlamydia pecorum</i> vaccine results in reduced chlamydial burden and less clinical disease in free-ranging koalas ( <i>Phascolarctos cinereus</i> ). PLoS ONE. 2016;11(1). doi: 10.1371/journal.pone.0146934.                                               |
| MOMP A, F & G    | Not stated      | 3           | 20 Healthy male and female            | Wild                | Increased <i>C. pecorum</i> IgG neutralisation effect elicited by the vaccine                                                                                   | Khan SA, Polkinghorne A, Waugh C, Hanger J, Loader J, Beagley K, et al. Humoral immune responses in koalas ( <i>Phascolarctos cinereus</i> ) either naturally infected with <i>Chlamydia pecorum</i> or following administration of a recombinant chlamydial major outer membrane protein vaccine. Vaccine. 2016;34(6):775-82. doi: 10.1016/j.vaccine.2015.12.050.            |
| MOMP, not stated | ISC,            | 1, 3        | 15 healthy male & female              | Wild                | Establishes a basis for the use of a single dose vaccine that can induce comparable and enhanced immunological responses when compared to a three dose vaccine. | Khan SA, Desclozeaux M, Waugh C, Hanger J, Loader J, Gerdtts V, et al. Antibody and cytokine responses of koalas ( <i>Phascolarctos cinereus</i> ) vaccinated with Recombinant Chlamydial Major Outer Membrane Protein (MOMP) with two different adjuvants. PLoS ONE. 2016;11(5). doi: 10.1371/journal.pone.0156094.                                                          |
|                  | Tri-Adj         |             |                                       |                     |                                                                                                                                                                 |                                                                                                                                                                                                                                                                                                                                                                               |
| MOMP A, F & G    | Tri-Adj         | 1           | 63 healthy male & female              | Wild                | Comparable results between antigens. However, some development of disease post vaccination (MOMP and PmpG)                                                      | Desclozeaux M, Robbins A, Jelocnik M, Khan SA, Hanger J, Gerdtts V, et al. Immunization of a wild koala population with a recombinant <i>Chlamydia pecorum</i> Major Outer Membrane Protein (MOMP) or Polymorphic Membrane Protein (PMP) based vaccine: New insights into immune response, protection and clearance. PLoS ONE. 2017;12(6). doi: 10.1371/journal.pone.0178786. |
| MOMP peptides    | Tri-Adj         | 1           | 69 healthy koalas (32 male/37 female) | Wild                | Indicated that peptide vaccine produced cellular immune responses but poor humoral immune responses                                                             | Quigley BL, Timms P, Nyari S, McKay P, Hanger J, Phillips S. Reduction of <i>Chlamydia pecorum</i> and Koala Retrovirus subtype B expression in wild koalas vaccinated with novel peptide and peptide/recombinant protein formulations. Vaccine: X. 2023;14:100329.                                                                                                           |

**Supplementary table 2. List of vaccine trials conducted in the Moreton Bay region utilising MOMP as the vaccine antigen and each specific vaccine efficacy**

| Vaccine group (Reference)      | Vaccine efficacy for incidence of disease |          |           |                  | Vaccine Efficacy for death with chlamydial disease |      |           |                  |
|--------------------------------|-------------------------------------------|----------|-----------|------------------|----------------------------------------------------|------|-----------|------------------|
|                                | Healthy                                   | Diseased | Incidence | Vaccine Efficacy | Alive                                              | Died | Incidence | Vaccine efficacy |
| Unvaccinated                   | 3022                                      | 268      | 0.081     | NA               | 610                                                | 54   | 0.081     | NA               |
| <i>Chlamydia</i> peptide       | 151                                       | 11       | 0.068     | 16.64%           | 23                                                 | 0    | 0.000     | 100%             |
| <i>Chlamydia</i> /KoRV peptide | 178                                       | 1        | 0.006     | 93.14%           | 22                                                 | 0    | 0.000     | 100%             |
| Peptide vaccine (16)           | 329                                       | 12       | 0.035     | 56.80%           | 45                                                 | 0    | 0.000     | 100.00%          |
| 3 dose MOMP (14, 26)           | 312                                       | 11       | 0.034     | 58.19%           | 43                                                 | 0    | 0.000     | 100%             |
| 1 dose MOMP (13, 14)           | 285                                       | 17       | 0.056     | 30.90%           | 44                                                 | 5*   | 0.102     | -25%             |
| MOMP 2022 <sup>#</sup>         | 106                                       | 2        | 0.019     | 77.27%           | 51                                                 | 0    | 0.000     | 100%             |
| 1 dose MOMP combined           | 391                                       | 19       | 0.046     | 43.11%           | 95                                                 | 5    | 0.050     | 39%              |

<sup>#</sup>Trial only conducted in the past year and includes 18 koalas that were previously vaccinated (boosted)

\*Five vaccinated koalas died or euthanised with signs of chlamydial disease

| Sex    | Date Vaccinated | Date died  | Days Vaccinated | Age at death | Disease                  |
|--------|-----------------|------------|-----------------|--------------|--------------------------|
| Male   | 12/1/2015       | 24/2/2015  | 43              | 7.05         | Urinary/Renal            |
| Female | 10/4/2015       | 20/12/2015 | 254             | 5.92         | Urinary and reproductive |
| Female | 29/10/2014      | 17/3/2016  | 505             | 11.38        | Reproductive only        |
| Female | 6/2/2015        | 10/7/2018  | 1250            | 14.56        | Urinary/Renal            |
| Female | 16/2/2015       | 26/2/2019  | 1471            | 10.97        | Urinary and reproductive |
